# Supplementary figures and images for: Foraminiferal survival after long-term in situ experimentally induced anoxia
Source: Copernicus journal article supplement (doi:10.5194/bg-10-7463-2013), 2013-11-21

M 1 2 3 4 5 6 7 8

1114 —  
501 —  
242 —  
190 —

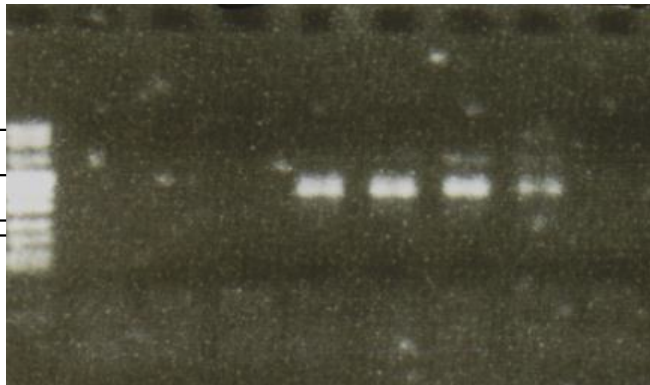

Supplement: Supplementary file 1 [file bg-10-7463-2013-supplement.zip]
